# Supplementary material
Source: publisher site journal article supplement (https://www.dovepress.com/article/541859)
Supplement: Supplementary file 1 [file 541859%20Table%20S1_1.docx]

| **Table S1. Basic characteristics of T2DM patients with normal thyroid function stratified by age** | | | | |
| --- | --- | --- | --- | --- |
| **Variables** | **18-44 years** | **45-64 years** | **>65 years** | **P** |
| Gender |  |  |  | 0.000*** |
| Male | 267 | 1023 | 307 |  |
| Female | 120 | 807 | 432 |  |
| BMI, kg/m2 | 25.01±4.34 | 24.58±3.38 | 24.77±3.39 | 0.073 |
| Education level |  |  |  | 0.000*** |
| Below high school | 157 | 1182 | 597 |  |
| High school and above | 230 | 648 | 142 |  |
| Job type |  |  |  | 0.002** |
| Blue-collar | 252 | 1310 | 555 |  |
| Other | 135 | 520 | 184 |  |
| Smoking |  |  |  | 0.000*** |
| Never | 203 | 1086 | 539 |  |
| Quit | 20 | 176 | 67 |  |
| Occasionally | 54 | 140 | 25 |  |
| Everyday | 110 | 428 | 107 |  |
| Drinking |  |  |  | 0.000*** |
| Never | 172 | 992 | 489 |  |
| Quit | 46 | 228 | 93 |  |
| Occasionally | 126 | 430 | 118 |  |
| Everyday | 43 | 178 | 38 |  |
| WHR | 0.93±0.08 | 0.95±0.07 | 0.96±0.08 | 0.000*** |
| SBP, mmHg | 121.88±16.37 | 133.5±20.10 | 144.29±20.51 | 0.000*** |
| DBP, mmHg | 74.25±12.38 | 79.58±11.11 | 79.52±11.28 | 0.000*** |
| TC, mmol/L | 5.07±1.70 | 4.9±2.22 | 4.69±1.29 | 0.006** |
| TG, mmol/L | 3.39±3.92 | 2.49±2.53 | 2.05±1.42 | 0.000*** |
| HDL, mmol/L | 1.05±0.35 | 1.16±0.35 | 1.21±0.36 | 0.000*** |
| LDL, mmol/L | 2.94±1.10 | 2.88±1.08 | 2.8±1.00 | 0.095 |
| ALT, mmol/L | 39.7±35.35 | 29.91±41.73 | 24.8±21.91 | 0.000*** |
| AST, mmol/L | 27.25±20.83 | 23.95±24.29 | 23.65±16.71 | 0.020* |
| Cr, μmol/L | 62.67±33.4 | 71.58±51.72 | 73.13±36.65 | 0.000 |
| FT3, pg/mL | 2.47±1.43 | 2.58±7.40 | 2.36±0.51 | 0.685*** |
| FT4, ng/dL | 1.25±0.56 | 1.19±0.36 | 1.19±0.25 | 0.007** |
| TSH, mU/L | 2.97±9.59 | 2.39±3.55 | 3.06±6.78 | 0.011* |
| VFA, cm2 | 75.85±46.54 | 79.02±43.06 | 87.93±43.08 | 0.000*** |
| SFA, cm2 | 155.35±68.62 | 151.07±58.04 | 165.10±60.19 | 0.000*** |

*P<0.05; **P<0.01; ***P<0.001
